# Supplementary material for: Assessing adverse events among home care clients in three Canadian provinces using chart review
Source: HighWire-hosted journal article supplement (doi:10.1136/bmjqs-2013-002039), 2013-07-04
Supplement: bmjqs-2013-002039supp_table1.pdf [file bmjqs-2013-002039supp_table1.pdf]

Appendix Table 1. Characteristics of clients with or without AE (all variables tested)

| Characteristic                                                                 | Adverse events |        |        |                      |
|--------------------------------------------------------------------------------|----------------|--------|--------|----------------------|
|                                                                                | No             | Yes    | Total  | p-value <sup>1</sup> |
| Sex: Proportion of Female (%) <sup>2</sup>                                     | 59.87          | 54.32  | 59.50  | 0.325                |
| Age (years)                                                                    | 71.20          | 75.93  | 71.52  | 0.016                |
| Client was at private home/apt before home care admission (%)                  | 54.78          | 55.56  | 54.83  | 0.892                |
| At the time of index admission, living alone (%)                               | 37.44          | 33.33  | 37.17  | 0.460                |
| Number of key informal helpers:                                                |                |        |        |                      |
| None                                                                           | 83             | 3      | 86     |                      |
| 1-2                                                                            | 868            | 76     | 944    |                      |
| 3 or more                                                                      | 41             | 2      | 43     |                      |
| Total                                                                          | 992            | 81     | 1073   | 0.318                |
| Length of stay (days)                                                          | 347.31         | 465.60 | 355.30 | 0.089                |
| Difficulty with communication at intake of index admission (%)                 | 12.34          | 21.25  | 12.95  | 0.220                |
| Difficulty with communication later on during index admission (%)              | 14.46          | 23.75  | 15.10  | 0.025                |
| Difficulty with communication at intake or later on during index admission (%) | 15.35          | 24.05  | 15.94  | 0.041                |
| Discharge alive from index admission (%)                                       | 88.74          | 82.72  | 88.33  | 0.103                |
| Significant procedure performed before admission (%)                           | 29.94          | 23.46  | 29.50  | 0.217                |
| Cognitive patterns problems (out of 3) <sup>4</sup>                            | .65            | 1.12   | .68    | 0.004                |
| Communication problems (out of 4)                                              | .71            | .96    | .72    | 0.017                |
| Mood & Behaviour problems (out of 2)                                           | .31            | .49    | .32    | 0.022                |
| IADL score = (1 independent, 4 dependent)                                      | 2.35           | 2.82   | 2.39   | 0.000                |
| IADL (% independent)                                                           | 43.9           | 27.4   | 42.6   | 0.000                |
| ADL (1 independent, 4 dependent)                                               | 1.63           | 1.86   | 1.65   | 0.015                |
| ADL (% independent)                                                            | 68.5           | 59.3   | 67.8   | 0.011                |
| Client functional status has deteriorated during admission (%)                 | 24.88          | 56.79  | 27.11  | 0.000                |
| Pain (%)                                                                       | 55.57          | 75.38  | 57.01  | 0.002                |
| History of falls (%)                                                           | 30.00          | 43.84  | 31.09  | 0.014                |
| Notation of environmental home hazard (%)                                      | 16.25          | 24.64  | 16.86  | 0.073                |
| Psychotropic medications (%)                                                   | 26.39          | 32.05  | 26.82  | 0.278                |
| Medications: Number of prescriptions & over-the-counter meds:                  |                |        |        |                      |
| None                                                                           | 33             | 2      | 35     |                      |
| 1-3                                                                            | 154            | 9      | 163    |                      |
| 4-9                                                                            | 532            | 36     | 568    |                      |
| >9                                                                             | 267            | 34     | 301    |                      |
| Total                                                                          | 986            | 81     | 1067   | 0.015                |

Appendix Table 1. Characteristics of clients with or without AE (all variables tested) (cont.)

| Characteristic                             | Adverse events |      |       |                      |
|--------------------------------------------|----------------|------|-------|----------------------|
|                                            | No             | Yes  | Total | p-value <sup>2</sup> |
| Number of comorbid conditions (out of 32)  | 3.94           | 5.56 | 4.05  | 0.000                |
| Cardiac and vascular disease (out of 7)    | 1.37           | 2.01 | 1.41  | 0.000                |
| Cerebrovascular accident (stroke)          | .11            | .17  | .12   | 0.097                |
| Transient ischemic attack                  | .08            | .15  | .08   | 0.032                |
| Congestive heart failure                   | .09            | .15  | .09   | 0.079                |
| Coronary artery disease                    | .21            | .40  | .22   | 0.000                |
| Hypertension                               | .50            | .67  | .51   | 0.004                |
| Peripheral vascular disease                | .08            | .10  | .09   | 0.645                |
| Other cardiac/vascular disorder            | .29            | .38  | .30   | 0.093                |
| Neurological (out of 6)                    | .19            | .31  | .20   | 0.068                |
| Alzheimer                                  | .05            | .07  | .05   | 0.345                |
| Other dementia                             | .07            | .17  | .08   | 0.002                |
| Acute brain injury                         | .01            | .01  | .01   | 0.953                |
| Hemiplegia/hemiparesis                     | .04            | .05  | .04   | 0.782                |
| Quadraplegia/quadraparesis                 | .01            | 0.00 | .01   | 0.475                |
| Multiple sclerosis                         | .01            | 0.00 | .01   | 0.370                |
| Senses (out of 2)                          | .17            | .16  | .17   | 0.856                |
| Cataract                                   | .13            | .12  | .13   | 0.965                |
| Glaucoma                                   | .04            | .04  | .04   | 0.773                |
| Psychiatric                                | .12            | .22  | .13   | 0.100                |
| Infections (out of 5)                      | .25            | .53  | .27   | 0.001                |
| HIV                                        | .00            | 0.00 | .00   | 0.703                |
| Pneumonia                                  | .07            | .14  | .07   | 0.018                |
| Tuberculosis                               | .00            | 0.00 | .00   | 0.590                |
| Urinary tract infection                    | .06            | .20  | .07   | 0.000                |
| Other Infection                            | .11            | .20  | .12   | 0.026                |
| Hematologic (out of 2)                     | .12            | .11  | .12   | 0.878                |
| Chronic Anemia                             | .10            | .10  | .10   | 0.926                |
| Other hematological disease/condition      | .02            | .01  | .02   | 0.580                |
| Cancer                                     | .27            | .25  | .27   | 0.690                |
| Diabetes                                   | .26            | .38  | .26   | 0.012                |
| Parkinson                                  | .02            | .04  | .02   | 0.224                |
| Musculoskeletal (out of 3)                 | .41            | .51  | .42   | 0.166                |
| Arthritis                                  | .25            | .31  | .26   | 0.259                |
| Hip fracture                               | .05            | .06  | .05   | 0.728                |
| Other fracture                             | .10            | .14  | .11   | 0.364                |
| Respiratory (out of 2)                     | .18            | .33  | .19   | 0.020                |
| Emphysema/Chronic obstructive lung disease | .12            | .25  | .13   | 0.001                |
| Asthma                                     | .06            | .09  | .06   | 0.338                |
| Other comorbid conditions not noted above  | .59            | .70  | .60   | 0.045                |

- 
1. p-value indicates significant difference between cases with and without adverse event, based on Chi-square test for categorical variables and t-test for continuous variables.  
None of the p-values correct for multiple comparisons.
  2. Indicates the percentage of clients with this characteristic.
  3. Indicates the average number of problems or conditions in this category.
